# Supplementary material
Source: PubMed Central journal article supplement (PMC3856779)
Supplement: 1309195110_pnas.201309195SI.pdf [file 1309195110_pnas.201309195SI.pdf]

# Supporting Information

Larson et al. 10.1073/pnas.1309195110

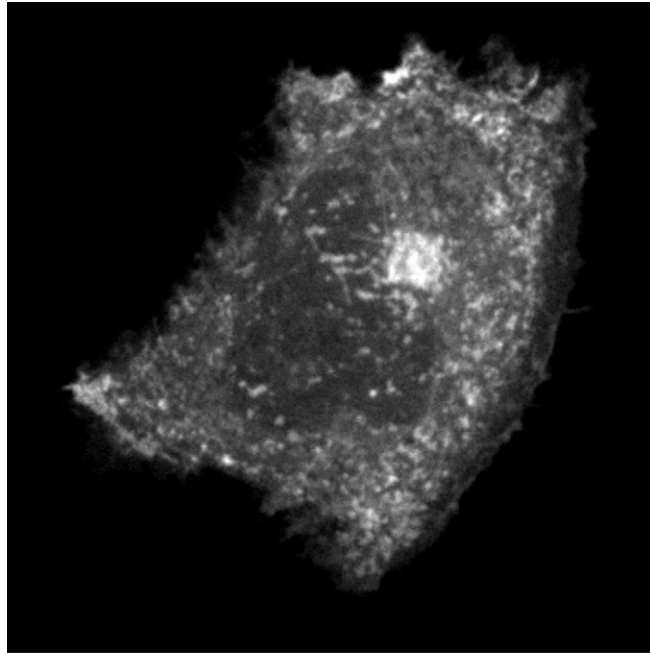

**Movie S1.** Time-lapse video of a live HeLa cell ectopically expressing mCherry-CvpA. Images were captured every 30 s for 15 min by confocal fluorescence microscopy and are shown at three frames per second.

[Movie S1](#)

## Other Supporting Information Files

[SI Appendix \(PDF\)](#)
